# Supplementary material for: A silicon-based functional self-assembled aptasensor for the detection of aflatoxin B1 by SERS sensing
Source: Royal Society of Chemistry journal article supplement (doi:10.1039/d4ay01266f), 2024-01-01
Supplement: d4ay01266f1.pdf [file d4ay01266f1.pdf]

## **Silicon-based functional self-assembled aptasensor for detection aflatoxin B1 by SERS sensing**

Zhiming Guo<sup>a, b\*</sup>, Xuan Fu<sup>a</sup>, Ruiyun Zhou<sup>a</sup>, Yang Zhang<sup>a</sup>, Hesham El-Seedi<sup>c, d</sup>,

Nicholas Watson<sup>b</sup>, Xiaobo Zou<sup>a, d</sup> and Megan Povey<sup>b</sup>

<sup>a</sup> *China Light Industry Key Laboratory of Food Intelligent Detection & Processing,  
School of Food and Biological Engineering, Jiangsu University, Zhenjiang 212013,  
China*

<sup>b</sup> *School of Food Science and Nutrition, University of Leeds, Leeds LS2 9JT, United  
Kingdom*

<sup>c</sup> *Department of Chemistry, Faculty of Science, Islamic University of Madinah,  
Madinah, 42351, Saudi Arabia*

<sup>d</sup> *International Joint Research Laboratory of Intelligent Agriculture and Agri-products  
Processing, Jiangsu University, Zhenjiang 212013, China*

\*Corresponding author at: School of Food and Biological Engineering, Jiangsu University, Zhenjiang 212013, China. Email addressed: guozhiming@ujs.edu.cn (Z. Guo)

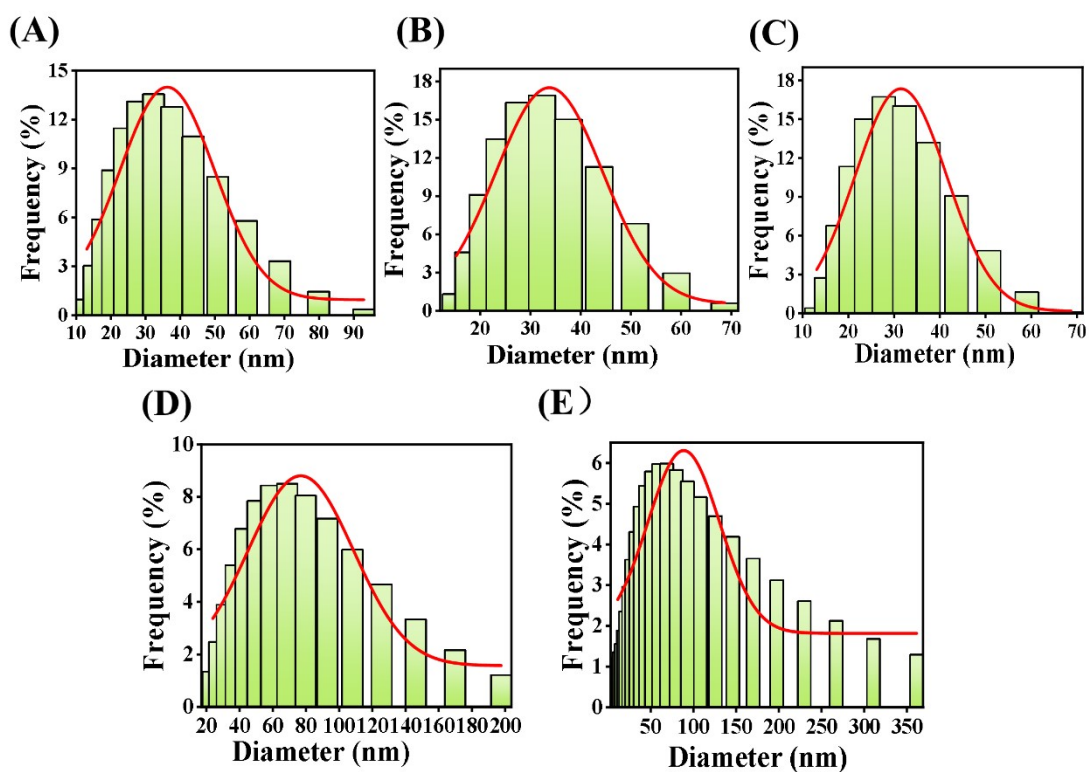

**Fig. S1** Particle size distribution from DLS results of Au@Ag NPs synthesized with different volumes of AgNO<sub>3</sub>, (A) 90 uL, (B) 120 uL, (C) 150 uL, (D) 180 uL, (E) 210 uL.

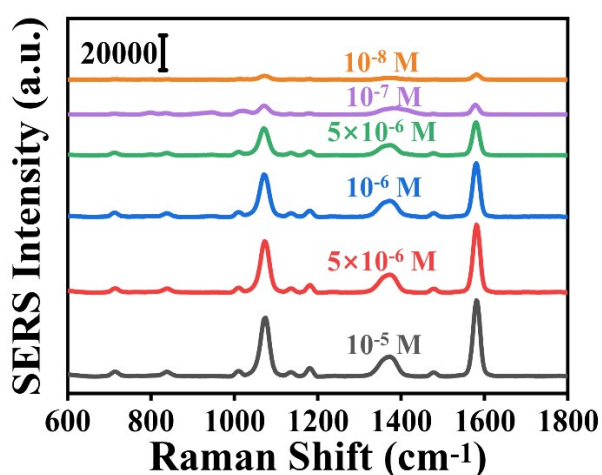

**Fig. S2** Raman characterization of Au<sup>MBA</sup>@Ag NPs synthesized using different concentrations of 4-MBA.

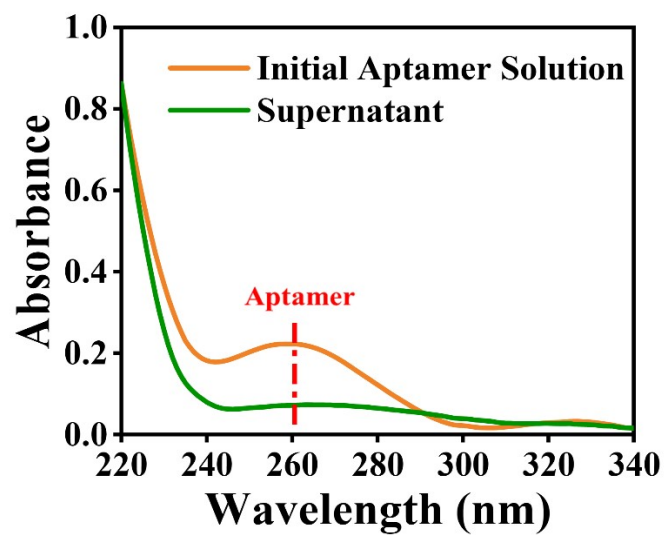

Fig. S3 UV-vis spectra of aptamers before and after binding to Si@AgNPs.

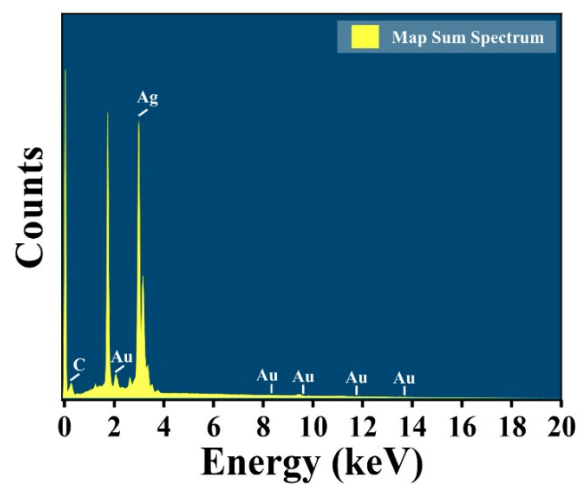

Fig. S4 Map sum spectrum of EDS for SERS aptasensor.

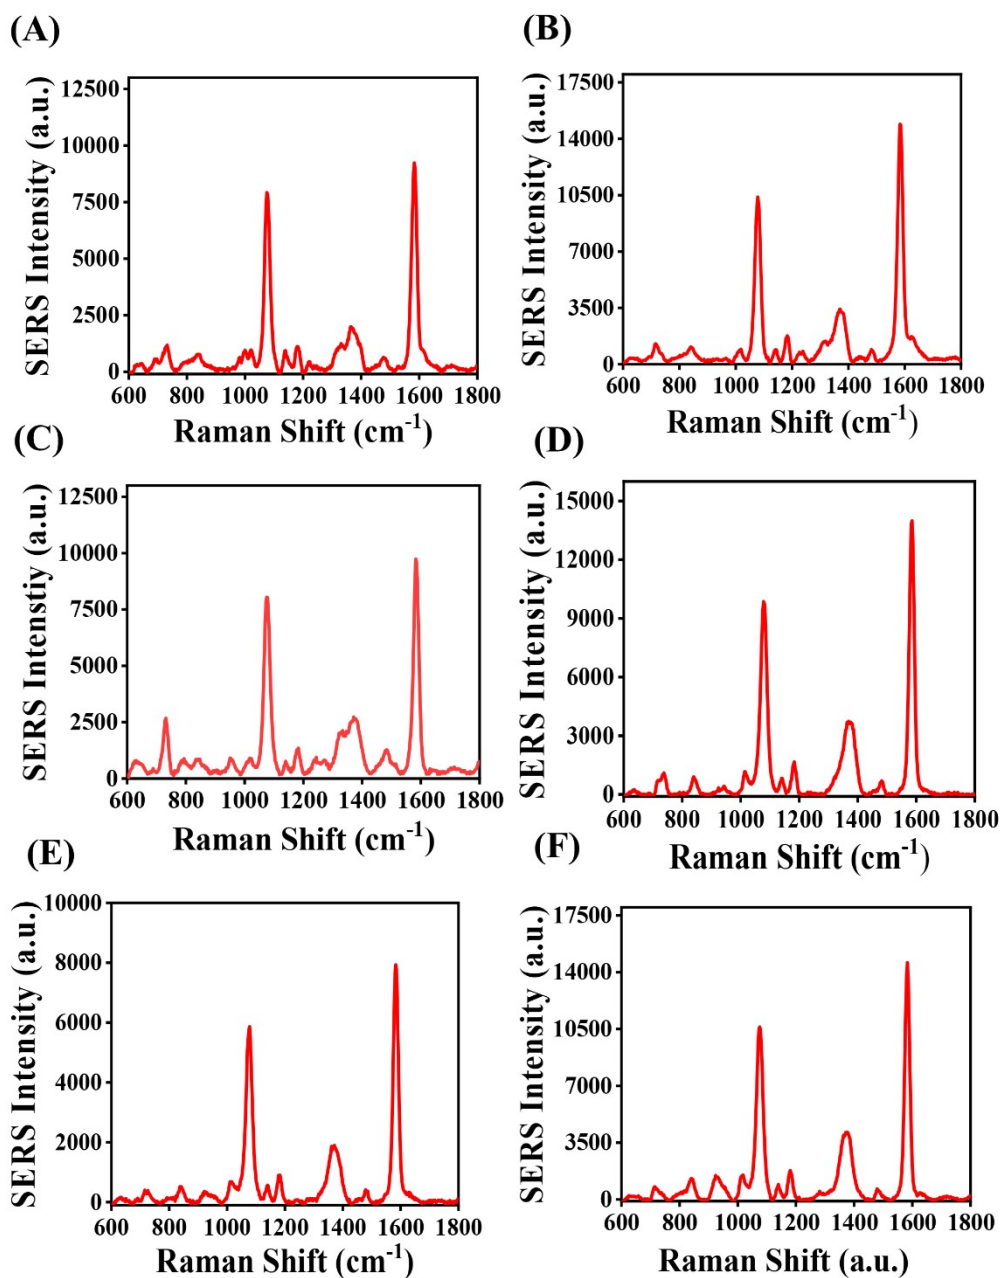

**Fig. S5** SERS spectra of positive corn samples contaminated by AFB1 with 9.71 ng/mL (A), 2.55 ng/mL (B), HPLC chromatogram of spiked corn samples: 10 ng/mL (C), 5 ng/mL (D), HPLC chromatogram of spiked corn oil samples: 10 ng/mL (E), 2.5 ng/mL (F).

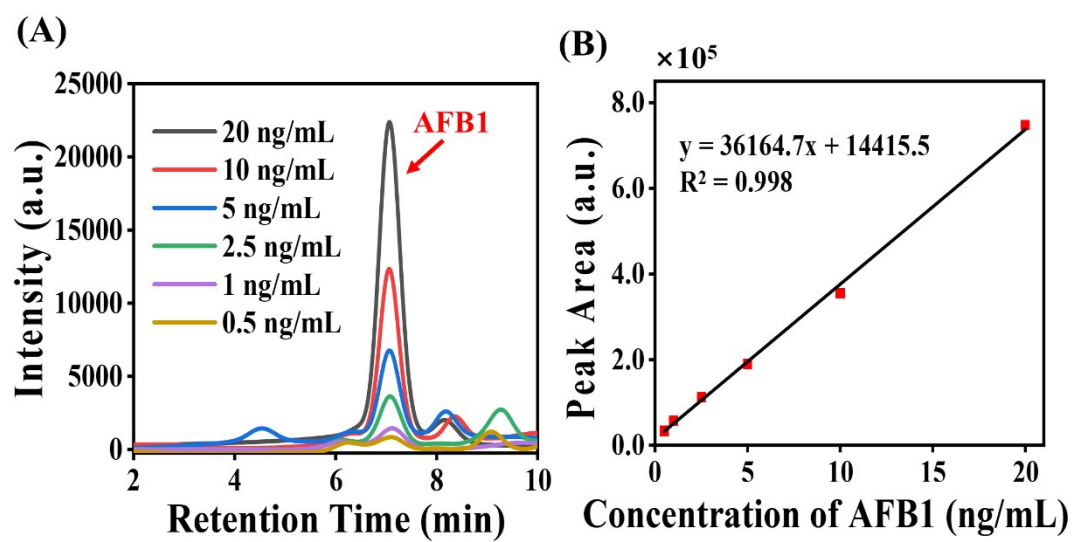

Fig. S6 (A) HPLC chromatogram and (B) calibration curve of AFB1 standard solution.

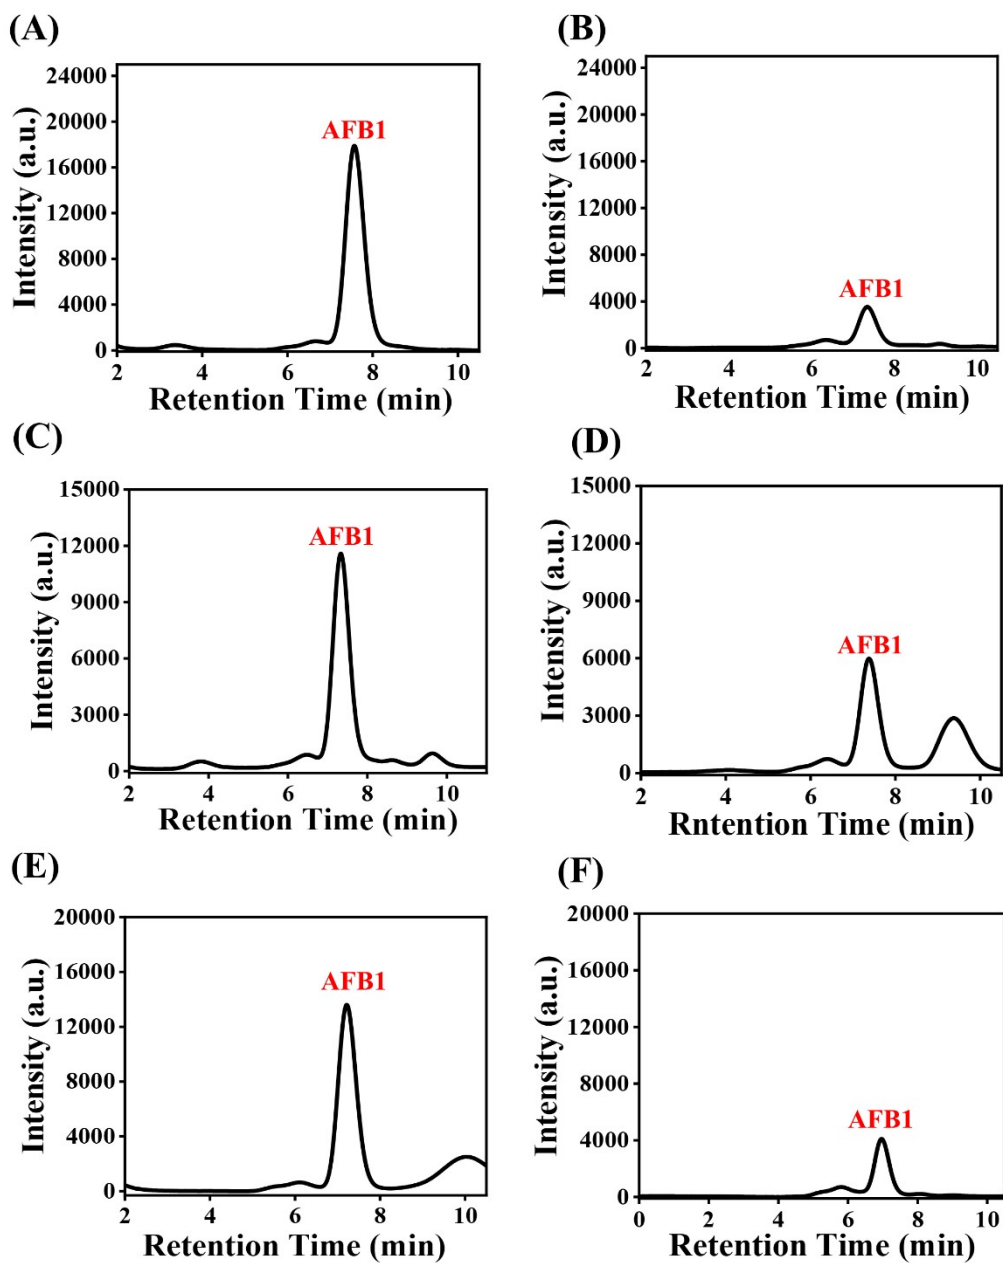

**Fig. S7** HPLC chromatogram of positive corn samples contaminated by AFB1 with (A) 9.71 ng/mL, (B) 2.55 ng/mL, Spiked corn samples: (C) 10 ng/mL, (D) 5 ng/mL, Spiked corn oil samples: (E) 10 ng/mL, (F) 2.5 ng/mL.

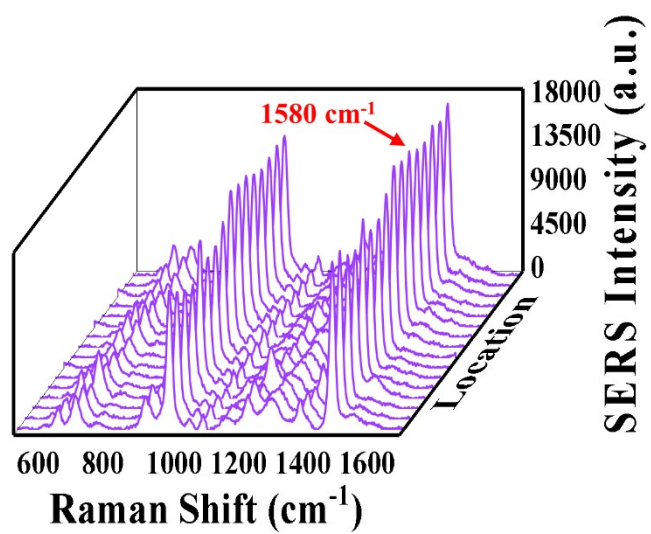

**Fig. S8** Raman spectra collected from 16 random points of SERS aptasensor after incubation with 0.1 ng/mL AFB1 standard solution
